# Supplementary material for: A novel TGF-β receptor II mutation (I227T/N236D) promotes aggressive phenotype of oral squamous cell carcinoma via enhanced EGFR signaling
Source: PubMed Central journal article supplement (PMC7694911; doi:10.1186/s12885-020-07669-5), 2020-11-27
Supplement: 12885_2020_7669_MOESM3_ESM.pdf [file 12885_2020_7669_MOESM3_ESM.pdf]

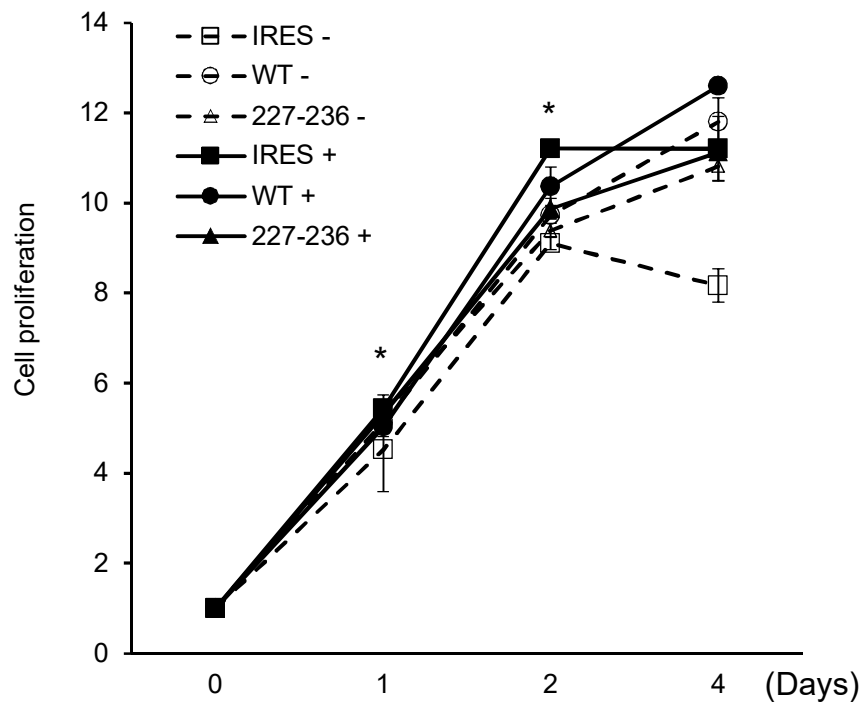

**Fig. S3.** The growth of stable transfectant cells harboring an empty vector (IRES), wild-type T $\beta$ RII (WT), or I227T/N236D T $\beta$ RII (227-236). The stable cells were cultured in the presence of vehicle (-) or 10 ng/mL of TGF- $\beta$ 1 (+) for up to 4 days. Cell proliferation was measured by MTT assay. Data represent mean  $\pm$  standard deviation. \* $P < 0.05$  (mutant vs. wild-type).
